# Supplementary material for: The Zinc Content of HIV-1 NCp7 Affects Its Selectivity for Packaging Signal and Affinity for Stem-Loop 3
Source: MDPI journal article supplement (doi:10.3390/v13101922), 2021-09-24
Supplement: s1 [file s1]

# The Zinc Content of HIV-1 NCp7 Affects Its Selectivity for Packaging Signal and Affinity for Stem-Loop 3

Ying Wang, Chao Guo, Xing Wang, Lianmei Xu, Rui Li and Jinzhong Wang

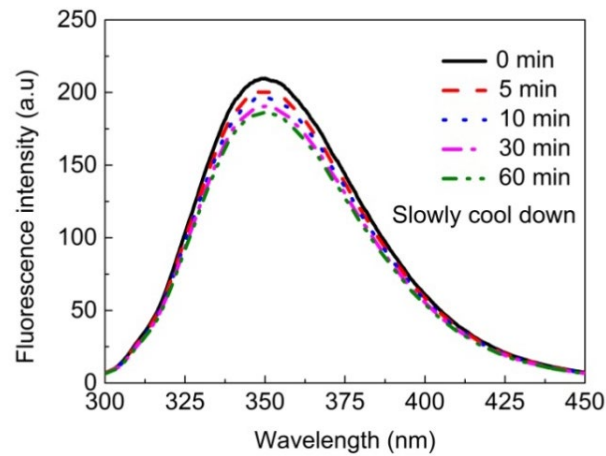

**Supplementary Figure S1.** Fluorescence spectra of NCp7 which was incubated at 100°C for 0, 5, 10, 30 or 60 min, respectively, and cooled down slowly to 25°C.
